# Supplementary material
Source: ML conference proceedings conference paper supplement (https://openreview.net/forum?id=wKf5dRSartn)
Supplement: supplementary_material [file attachment]

---

# Supplementary Material for Paper 6775 (On Batch Teaching with Sample Complexity Bounded by VCD)

---

Anonymous Author(s)

Affiliation

Address

email

## Abstract

1 This paper contains proof details omitted from the main paper as well as a more  
2 detailed discussion of the ambiguity of  $\text{STD}_{\min}$ -teaching.

### 3 A Proof of Theorem 9

4 **Theorem 9** Let  $T^n$  be an antichain teacher for  $\mathcal{P}_n$  and suppose  $\text{ord}(T^n) \leq \text{ord}(T)$  for all antichain  
5 teachers  $T$  for  $\mathcal{P}_n$ . Then, for all but finitely many  $n$ , we have  $0.22 \cdot n < \text{ord}(T^n) < 0.23 \cdot n$ .

6 To establish this result, we first introduce some notation and some background on bipartite matching.

7 **Definition 21** Let  $\mathcal{C}$  be any concept class. The antichain number of  $\mathcal{C}$ , denoted by  $\text{ACN}(\mathcal{C})$ , is the  
8 smallest possible order of a teacher for  $\mathcal{C}$  with the antichain property.

9 Theorem 9 can then be restated as follows:

10 For all but finitely many  $n$ , we have  $0.22 \cdot n < \text{ACN}(\mathcal{P}_n) < 0.23 \cdot n$ .

11 It is well known that a bipartite graph all of whose vertices have the same degree contains a perfect  
12 matching. The simple proof is based on a double counting argument. The same kind of argument can  
13 be used to show the following (most likely also well known) result:

14 **Lemma 22** Let  $G = (V_1, V_2, E)$  be a bipartite graph with vertex sets  $V_1$  and  $V_2$ . Suppose that every  
15 vertex in  $V_1$  has degree  $d_1$  while every vertex in  $V_2$  has degree  $d_2 \leq d_1$ . Then  $G$  contains a matching  
16 of size  $|V_1|$ .

17 **Proof.** For  $U \subseteq V_1$ ,  $\Gamma(U)$  denotes the neighborhood of  $U$ , i.e.,  $\Gamma(U) = \{v \in V_1 \mid v \text{ is adjacent to}$   
18  $\text{some vertex in } U\}$ . It suffices to show that Hall's condition,

$$\forall U \subseteq V_1 : |\Gamma(U)| \geq |U| ,$$

19 is satisfied. Fix a set  $U \subseteq V_1$ . The number of edges having one endpoint in  $U$  equals  $d_1 \cdot |U|$ . The  
20 number of edges having one endpoint in  $\Gamma(U)$  is at most  $d_2 \cdot |\Gamma(U)|$ . An edge with an endpoint in  $U$   
21 must have its other endpoint in  $\Gamma(U)$ . Hence  $d_1 \cdot |U| \leq d_2 \cdot |\Gamma(U)|$ . Since  $d_2 \leq d_1$ , we may conclude  
22 that  $|U| \leq |\Gamma(U)|$ .  $\square$

23 **Corollary 23** Let  $d, n$  be integers such that  $1 \leq d \leq (n + 1)/2$ . Let  $X$  be a set of size  $n$ . Let  
24  $G = (V_1, V_2, E)$  be the bipartite graph such that

- 25
  - $V_1$  (resp.  $V_2$ ) consists of all subsets of  $X$  with  $d - 1$  (resp.  $d$ ) elements,

26 • a set  $U \in V_1$  is adjacent to a set  $U' \in V_2$  iff  $U \subseteq U'$ .

27 Then  $G$  contains a matching of size  $|V_1|$ .

28 **Proof.** Each vertex in  $V_1$  has degree  $n - d + 1$  whereas each vertex in  $V_2$  has degree  $d$ . Since  
29  $d \leq (n + 1)/2$ , by assumption, it follows that  $d \leq n - d + 1$ . Now apply Lemma 22.  $\square$

30 Let  $X$  be a set of size  $n$ . A sample set over  $X$  is said to be *conflict-free* if it does not contain both  
31  $(x, 0)$  and  $(x, 1)$  for some  $x \in X$ . Let  $\mathcal{F}_{\leq d, n}$  be the family of all conflict-free sample sets over  $X$   
32 with  $d$  or fewer elements. The conflict-free sample sets with exactly  $d$  elements form an antichain –  
33 denoted by  $\mathcal{F}_{=d, n}$  in the sequel – in  $\mathcal{F}_{\leq d}$ . Obviously

$$\mathcal{F}_{=d, n} = \{(x_1, b_1), \dots, (x_d, b_d) : x_1, \dots, x_d \text{ are } d \text{ distinct elements of } X \text{ and } b_1, \dots, b_d \in \{0, 1\}\}$$

34 and therefore the antichain  $\mathcal{F}_{=d, n}$  is of size  $\binom{n}{d} \cdot 2^d$ .

35 The following result is a relative of Sperner's Theorem:

36 **Lemma 24**  $\mathcal{F}_{=d, n}$  is a maximum antichain in  $\mathcal{F}_{\leq d, n}$ .

37 **Proof.** An antichain  $\mathcal{A}'$  with conflict-free sets  $A'_1, \dots, A'_{s'}$  (without repetition) is called an *extension*  
38 of another antichain  $\mathcal{A}$  with conflict-free sets  $A_1, \dots, A_s$  (again without repetition) if  $s' = s$  and  
39  $A_i \subseteq A'_i$  for  $i = 1, \dots, s$  (after renumbering the sets in  $\mathcal{A}'$  if necessary). We show, by induction on  
40  $d$ , that every antichain  $\mathcal{A}$  with sets taken from  $\mathcal{F}_{\leq d, n}$  has an extension  $\mathcal{A}'$  with sets taken from  $\mathcal{F}_{=d, n}$ .  
41 For  $d = 1$ , this is obviously true. Let  $d \geq 2$  and assume inductively that it holds for  $d - 1$ . Fix an  
42 antichain  $\mathcal{A}$  with sets taken from  $\mathcal{F}_{\leq d, n}$ . Let  $\mathcal{A}_1$  be the antichain consisting of the sets of size at  
43 most  $d - 1$  in  $\mathcal{A}$  and let  $\mathcal{A}_2 = \mathcal{A} \setminus \mathcal{A}_1$ . By our inductive assumption, there is an extension  $\mathcal{A}'_1$  of  $\mathcal{A}_1$   
44 whose sets are taken from  $\mathcal{F}_{\leq d-1, n}$ . The inductive proof can now be accomplished by proving the  
45 following assertions:

46 **Claim 1:**  $\mathcal{A}'_1 \cup \mathcal{A}_2$  is an antichain in  $\mathcal{F}_{\leq d, n}$  whose sets are of size  $d - 1$  or  $d$ .

47 **Claim 2:** Any antichain  $\mathcal{B}$  with sets of size  $d - 1$  or  $d$  has an extension  $\mathcal{B}'$  with sets taken from  
48  $\mathcal{F}_{=d, n}$ .

49 Claim 1 becomes obvious from the following observations:

- 50 • No set in  $\mathcal{A}_2$  (with  $d$  elements) can be a subset of some set in  $\mathcal{A}'_1$  (with  $d - 1$  elements).  
51 • Since no set in  $\mathcal{A}_1$  is a subset of some set in  $\mathcal{A}_2$  (by the antichain property of  $\mathcal{A}$ ), no set in  
52 the extension  $\mathcal{A}'_1$  is a subset of some set in  $\mathcal{A}_2$ .

53 As for proving Claim 2, fix some antichain  $\mathcal{B}$ . Let  $\mathcal{B} = \mathcal{B}_1 \cup \mathcal{B}_2$  be the decomposition of  $\mathcal{B}$  into sets of  
54 size  $d - 1$  and sets of size  $d$ , respectively. A set of  $\mathcal{B}_1$  is of the form  $B = \{(x_1, b_1), \dots, (x_{d-1}, b_{d-1})\}$ .  
55 Let  $M$  be the matching of size  $|V_1|$ , whose existence is guaranteed by Corollary 23. Pick  $x_d$  such  
56 that  $\{x_1, \dots, x_{d-1}, x_d\}$  is the  $M$ -partner of  $\{x_1, \dots, x_{d-1}\}$ . Then the set

$$B' = \{(x_1, b_1), \dots, (x_{d-1}, b_{d-1}), (x_d, 0)\}$$

57 is called the  $M$ -partner of  $B$ . Note here that different sets from  $\mathcal{B}_1$  have different  $M$ -partners.  
58 Let  $\mathcal{B}'_1$  be the antichain obtained from  $\mathcal{B}_1$  by replacing each set  $B$  in  $\mathcal{B}_1$  by its  $M$ -partner and let  
59  $\mathcal{B}' = \mathcal{B}'_1 \cup \mathcal{B}_2$ . By construction, all sets in  $\mathcal{B}'$  are of size  $d$ . In order to show that  $\mathcal{B}'$  is an antichain  
60 that extends  $\mathcal{B}$ , it suffices to show that no  $M$ -partner of a set  $B \in \mathcal{B}_1$  can be equal to one of the sets  
61 in  $\mathcal{B}_2$ . But this is obvious because  $B$  is a subset of its  $M$ -partner, but not a subset of any set in  $\mathcal{B}_2$  (by  
62 the antichain property of  $\mathcal{B}$ ). Claim 2 follows from this discussion, which also completes the proof of  
63 the lemma.  $\square$

64 **Corollary 25** Let  $d_0 = d_0(n)$  be the smallest  $d$  such that  $2^d \cdot \binom{n}{d} \geq 2^n$ . Let  $G = (V_1, V_2, E)$  be the  
65 bipartite graph given by (i)  $V_1 = \mathcal{F}_{=n, n}$  and  $V_2 = \mathcal{F}_{=d_0, n}$ , and (ii) a set  $U' \in V_1$  is adjacent to a set  
66  $U \in V_2$  iff  $U \subseteq U'$ . Then  $G$  contains a matching of size  $|V_1|$ .

67 **Proof.** Each vertex in  $V_1$  has degree  $\binom{n}{d_0}$  whereas each vertex in  $V_2$  has degree  $2^{n-d_0}$ . The definition  
68 of  $d_0$  implies that  $2^{n-d_0} \leq \binom{n}{d_0}$ . Now apply Lemma 22.  $\square$

69 Note that  $\text{ACN}(\mathcal{C})$  is upper-bounded by the smallest number  $d$  such that the following graph  $G =$   
70  $(V_1, V_2, E)$  contains a matching  $M$  that matches every vertex in  $V_1$ : (i)  $V_1 = \mathcal{C}$  and  $V_2 = \mathcal{F}_{=d,n}$ , (ii)  
71 a concept  $C \in \mathcal{C}$  is adjacent to a sample  $S \in \mathcal{F}_{=d,n}$  iff it is consistent with  $S$ .

72 We now obtain a non-trivial reformulation of ACN:

73 **Theorem 26** *Let  $|X| = n$  and let  $d_0 = d_0(n)$  be the smallest  $d$  such that  $2^d \cdot \binom{n}{d} \geq 2^n$ . Then*  
74  $\text{ACN}(\mathcal{P}_n) = d_0(n)$ .

75 **Proof.** Note that  $\mathcal{P}_n$  can be identified with  $\mathcal{F}_{=n,n}$ : each map  $C : X \rightarrow \{0, 1\}$  is identified with the  
76 full sample  $\{(x, C(x)) \mid x \in X\}$ . An application of Corollary 25 yields  $\text{ACN}(\mathcal{P}_n) \leq d_0(n)$ .

77 Set  $d = \text{ACN}(\mathcal{P}_n)$ . Then the maximum antichain in  $\mathcal{F}_{\leq d,n}$  is of size at least  $|\mathcal{P}_n| = 2^n$ . Using  
78 Lemma 24 and the fact that  $|\mathcal{F}_{=d,n}| = \binom{n}{d} \cdot 2^d$ , this translates into  $2^d \cdot \binom{n}{d} \geq 2^n$ . The definition of  
79  $d_0(n)$  now implies that  $d \geq d_0(n)$ .  $\square$

80 We now show that  $d_0(n)$  is a function linear in  $n$ .

81 **Lemma 27** *Let  $d_0 = d_0(n)$  be the smallest  $d$  such that  $2^d \cdot \binom{n}{d} \geq 2^n$ . Then  $0.22 \cdot n < d_0(n) < 0.23 \cdot n$*   
82 *for all but finitely many  $n$ .*

83 **Proof.** For  $d = n/2$ , we have  $\binom{n}{n/2} \asymp \sqrt{\frac{2}{\pi n}} 2^n$ , which is asymptotically larger than  $2^{n/2}$ . We  
84 may therefore assume that  $d \leq n/2$ . For such  $d$ , the term  $\binom{n}{d}$  decreases when  $d$  decreases, while  
85  $2^{n-d}$  increases. Hence it suffices to show that  $2^d \cdot \binom{n}{d} \geq 2^n$  is fulfilled for large enough  $n$  when  
86  $d = 0.23 \cdot n$ , while it is not fulfilled for large enough  $n$  when  $d = 0.22 \cdot n$ .

87 To this end, let  $d = pn$  with  $0 < p \leq 1/2$ , and rewrite  $2^d \cdot \binom{n}{d} \geq 2^n$  as

$$\frac{1}{n} \log \binom{n}{pn} \geq 1 - p.$$

88 It is well known that the left-hand side converges to  $H(p)$ , where  $H(\cdot)$  denotes the binary entropy.  
89 The lemma now follows from  $H(0.22) < 0.78 = 1 - 0.22$  and  $H(0.23) > 0.77 = 1 - 0.23$ .  $\square$

90 This allows us to conclude that, asymptotically, the value of  $\text{ACN}(\mathcal{P}_n)$  lies between  $0.22 \cdot n$  and  
91  $0.23 \cdot n$ , as claimed by Theorem 9.

## 92 B Other Proof Details for Section 3

93 **Proposition 8** *Let  $\mathcal{C}$  be any concept class,  $Z \in \{\text{RTD}, \text{NCTD}\}$ , and  $T$  any  $Z$ -teacher for  $\mathcal{C}$ . Then*  
94 *there is a  $Z$ -teacher  $T'$  for  $\mathcal{C}$  with  $\text{ord}(T') = \text{ord}(T)$  such that  $T'$  has the antichain property.*

95 **Proof.** First, let  $T$  be any NCTD-teacher for  $\mathcal{C}$ . For  $C \in \mathcal{C}$ , obtain  $T'(C)$  from  $T(C)$  as follows. If  
96 each sample set in  $T(C)$  has size  $\text{ord}(T)$ , then  $T'(C) = T(C)$ . Otherwise,  $T'(C)$  results from  $T(C)$   
97 by adding examples that are consistent with  $C$  to every sample set  $T_C \in T(C)$ , until the size of  $T_C$   
98 equals  $\text{ord}(T)$ . Then  $T'$  inherits the non-clashing property on  $\mathcal{C}$  from  $T$ . Clearly, a non-clashing  
99 teacher mapping that produces only sample sets of a constant size must also fulfill the antichain  
100 property. So  $T'$  is an NCTD-teacher for  $\mathcal{C}$  with the antichain property, and  $\text{ord}(T') = \text{ord}(T)$ .

101 Second, suppose  $T$  is an RTD-teacher. The construction of  $T'$  is identical to that in the first case.  
102 It remains to verify that the resulting antichain teacher  $T'$  with  $\text{ord}(T') = \text{ord}(T)$  is also an RTD-  
103 teacher for  $\mathcal{C}$ . Using the notation from Definition 2, we know that, for  $C \in \mathcal{C}_i^{\min}$ , the set  $T(C)$  is  
104 a teaching set for  $C$  wrt  $\mathcal{C}_i$ . Since adding examples (consistently with  $C$ ) to  $T(C)$  does not change  
105 this fact, we obtain that, for  $C \in \mathcal{C}_i^{\min}$ , the set  $T'(C)$  is a teaching set for  $C$  wrt  $\mathcal{C}_i$ . Hence  $T'$  is an  
106 RTD-teacher for  $\mathcal{C}$ .  $\square$

107 **Proposition 11** *STD is not domain-monotonic. In particular, for every  $n > 3$ , there is a concept*  
108 *class  $\mathcal{C}$  over a domain  $X = X' \cup X''$  such that  $\text{STD}(\mathcal{C}) = n - 1$ , while  $\text{STD}(\mathcal{C} \downarrow_{X'}) = 2$ .*

109 **Proof.** Let  $n > 3$ , and let  $X' = \{x'_1, \dots, x'_n\}$  and  $X'' = \{x''_1, \dots, x''_n\}$ . For every  $J \subseteq [n]$  of size 1  
110 or 2, let  $C_J$  be the concept that assigns label 1 (resp. label 0) to  $x'_j$  and  $x''_j$  if  $j \in J$  (resp. if  $j \notin J$ ).  
111 Let  $C_\emptyset$  be the concept that assigns label 0 to  $x'_1, \dots, x'_n$  and label 1 to  $x''_1, \dots, x''_n$ . Consider now the

112 following concept class  $\mathcal{C}$  over the domain  $X = X' \cup X''$ :  $\mathcal{C} = \{C_J \mid J \subseteq [n], 0 \leq |J| \leq 2\}$ . See  
 113 Table 3 for an illustration of the case  $n = 5$ .

114 Note that  $\mathcal{C}_{\downarrow X'}$  is the class of all subsets of  $X$  whose size is at most 2. It is well known [Zilles et al.,  
 115 2011] that  $\text{STD}(\mathcal{C}_{\downarrow X'}) = 2$ .

116 It remains to prove that  $\text{STD}(\mathcal{C}) = n - 1$ . To this end, we first determine the minimum teaching sets  
 117 for every concept in  $\mathcal{C}$ :

118 (i) The minimum teaching sets for  $C_\emptyset$  are the sets of the form  $\{(x'_j, 0), (x''_j, 1)\}$  for  $j = 1, \dots, n$ .

119 (ii) For  $1 \leq i < j \leq n$ , the minimum teaching sets for  $C_{\{i,j\}}$  are the sets of the form  $\{(u_i, 1), (u_j, 1)\}$   
 120 where  $u_i \in \{x'_i, x''_i\}$ ,  $u_j \in \{x'_j, x''_j\}$  and  $\{u_i, u_j\} \cap \{x'_i, x'_j\} \neq \emptyset$ .

121 (iii) For  $1 \leq i \leq n$ , the minimum teaching sets for  $C_{\{i\}}$  are the sets of the form  $\{(u_j, 0) \mid j \in$   
 122  $[n] \setminus \{i\}\}$  where  $u_j \in \{x'_j, x''_j\}$  and, for at least one index  $j' \in [n] \setminus \{i\}$ , we have  $u_{j'} = x''_{j'}$ .

123 For each  $C \in \mathcal{C}$ , let  $\text{TS}(C)$  be the collection of minimum teaching sets for  $C$ . The largest of these  
 124 minimum teaching sets, namely the ones for concepts of the form  $C_{\{i\}}$ , are of size  $n - 1$ . Hence  
 125  $\text{TD}(\mathcal{C}) = n - 1$ . Next, we will verify the following property for every concept  $C \in \mathcal{C}$ :

126 (\*) If  $S$  is a minimum teaching set for  $C$  wrt  $\mathcal{C}$ , then every proper subset of  $S$  is  
 127 contained in a minimum teaching set for some concept  $C'$  wrt  $\mathcal{C}$ , where  $C' \in \mathcal{C}$ ,  
 128  $C' \neq C$ .

129 (i) Consider an index  $j \in [n]$  and a teaching set  $\{(x'_j, 0), (x''_j, 1)\} \in \text{TS}(C_\emptyset)$ . Removing  $(x'_j, 0)$   
 130 from this set yields a subset of one of the teaching sets for  $C_J \neq C_\emptyset$  whenever  $j \in J$  and  $|J| = 2$ . A  
 131 similar reasoning applies when removing  $(x''_j, 1)$  instead of  $(x'_j, 0)$ .

132 (ii) Consider indices  $i \neq j \in [n]$  and a teaching set  $\{(u_i, 1), (u_j, 1)\} \in \text{TS}(C_{\{i,j\}})$ . Removing  
 133 one example, say  $(u_i, 1)$ , from this set yields a subset of one of the teaching sets for  $C_J \neq C_{\{i,j\}}$   
 134 whenever  $j \in J$ ,  $i \notin J$  and  $|J| = 2$ .

135 (iii) Consider an index  $i \in [n]$  and a teaching set  $\{(u_j, 0) \mid j \in [n] \setminus \{i\}\} \in \text{TS}(C_{\{i\}})$ . Removing  
 136  $(u_{j_0}, 0)$  from this set yields a subset of one of the teaching sets for  $C_{\{j_0\}}$ .

137 This establishes Property (\*), which immediately implies  $\text{STD}(\mathcal{C}) = \text{TD}(\mathcal{C}) = n - 1$ . □

| concept       | $x_1$    | $x_2$    | $x_3$    | $x_4$    | $x_5$    | $x'_1$ | $x'_2$   | $x'_3$   | $x'_4$   | $x'_5$   |
|---------------|----------|----------|----------|----------|----------|--------|----------|----------|----------|----------|
| $C_\emptyset$ | 0        | 0        | 0        | 0        | <b>0</b> | 1      | 1        | 1        | 1        | <b>1</b> |
| $C_{\{1\}}$   | 1        | 0        | 0        | 0        | 0        | 1      | <b>0</b> | <b>0</b> | <b>0</b> | <b>0</b> |
| $C_{\{2\}}$   | <b>0</b> | 1        | 0        | 0        | 0        | 0      | 1        | <b>0</b> | <b>0</b> | <b>0</b> |
| $C_{\{3\}}$   | <b>0</b> | <b>0</b> | 1        | 0        | 0        | 0      | 0        | 1        | <b>0</b> | <b>0</b> |
| $C_{\{4\}}$   | <b>0</b> | <b>0</b> | <b>0</b> | 1        | 0        | 0      | 0        | 0        | 1        | <b>0</b> |
| $C_{\{5\}}$   | <b>0</b> | <b>0</b> | <b>0</b> | 0        | 1        | 0      | 0        | 0        | <b>0</b> | 1        |
| $C_{\{1,2\}}$ | <b>1</b> | <b>1</b> | 0        | 0        | 0        | 1      | 1        | 0        | 0        | 0        |
| $C_{\{1,3\}}$ | <b>1</b> | 0        | <b>1</b> | 0        | 0        | 1      | 0        | 1        | 0        | 0        |
| $C_{\{1,4\}}$ | <b>1</b> | 0        | 0        | <b>1</b> | 0        | 1      | 0        | 0        | 1        | 0        |
| $C_{\{1,5\}}$ | <b>1</b> | 0        | 0        | 0        | <b>1</b> | 1      | 0        | 0        | 0        | 1        |
| $C_{\{2,3\}}$ | 0        | <b>1</b> | 1        | 0        | 0        | 0      | 1        | <b>1</b> | 0        | 0        |
| $C_{\{2,4\}}$ | 0        | <b>1</b> | 0        | 1        | 0        | 0      | 1        | 0        | <b>1</b> | 0        |
| $C_{\{2,5\}}$ | 0        | <b>1</b> | 0        | 0        | 1        | 0      | 1        | 0        | 0        | <b>1</b> |
| $C_{\{3,4\}}$ | 0        | 0        | 1        | <b>1</b> | 0        | 0      | 0        | <b>1</b> | 1        | 0        |
| $C_{\{3,5\}}$ | 0        | 0        | 1        | 0        | <b>1</b> | 0      | 0        | <b>1</b> | 0        | 1        |
| $C_{\{4,5\}}$ | 0        | 0        | 0        | 1        | <b>1</b> | 0      | 0        | 0        | <b>1</b> | 1        |

Table 3: The concept class  $\mathcal{C}$  from the proof of Proposition 11 for  $n = 5$ . The entries in bold indicate one (arbitrarily chosen) minimum teaching set for each concept.

138 **C Proof Details for Section 4**

139 **Observation 1** Every subset teaching sequence of order  $d$  can be transformed into a normalized  
 140 sequence  $(T_k)_{k \in \mathbb{N}}$  of the same order, where a normalized subset teaching sequence has the property  
 141 that, for every  $k$  and every  $C \in \mathcal{C}$ , we have (i)  $T_{k+1}$  differs from  $T_k$  on exactly one concept, (ii)  
 142  $|T_{k+1}(C)| \in \{|T_k(C)| - 1, |T_k(C)|\}$ , (iii)  $|T_k(C)| \geq d$ , which implies that  $|T_{k^*}(C)| = d$ .

143 **Proof.** Properties (i) and (ii) are easy to achieve by breaking a step from  $T_k$  to  $T_{k+1}$  into several  
 144 smaller intermediate steps. Assume that (ii) holds. Then property (iii) can be achieved by omitting  
 145 all steps that make  $|T_k(C)|$  smaller than  $d$ . It is easy to see that the resulting sequence is again an  
 146 admissible subset teaching sequence.  $\square$

147 **Proposition 13**  $\text{STD}_{\min}(\mathcal{C}) \leq \text{STD}(\mathcal{C})$ , and for all  $n \in \mathbb{N}$  there is some succinct  $\mathcal{C}_n$  such that  
 148  $\text{STD}_{\min}(\mathcal{C}_n) = 2$  and  $\text{STD}(\mathcal{C}) = n$ .

149 **Proof.** To see that  $\text{STD}_{\min}$  is bounded from above by  $\text{STD}$ , let  $k^*$  be as defined in Definition 4. For  
 150 each  $k \leq k^*$ , let  $T_k(C)$  be any one set in  $\text{STS}^k(C)$  such that  $T_{k^*}(C) \subseteq T_{k^*-1}(C) \subseteq \dots \subseteq T_1(C)$ .  
 151 Such sets  $T_k(C)$  exist by the definition of  $\text{STD}$ . Finally, set  $T_0(C) = \{(x, C(x)) \mid x \in X\}$ . Then  
 152  $\mathcal{T} = (T_k)_{k \in \mathbb{N}}$  is a subset teaching sequence of order  $\text{STD}(\mathcal{C})$  for  $\mathcal{C}$ . So,  $\text{STD}_{\min}(\mathcal{C}) \leq \text{STD}(\mathcal{C})$ .

153 An example of a succinct concept class  $\mathcal{C}_n$  as claimed is the class over a domain of size  $n + 1$ ,  
 154 consisting of all concepts of size either 1 or 2. It was shown by Zilles et al. [2011], that  
 155  $\text{STD}(\mathcal{C}) = n$ . By contrast, one can easily obtain  $\text{STD}_{\min}(\mathcal{C}_n) = 2$ , as illustrated in Table 4:  
 156 for any concept  $C$  of size 2, the set  $T_1(C)$  contains only the two positively labeled instances for  
 157  $C$ , while  $T_1(C) = T_0(C) = \{(x, C(x)) \mid x \in X\}$  if  $C$  is a singleton. In the next iteration, set  
 158  $T_2(\{x_n\}) = \{(x_n, 1), (x_1, 0)\}$  and  $T_2(\{x_i\}) = \{(x_i, 1), (x_{i+1}, 0)\}$  for each singleton concept  $\{x_i\}$   
 159 with  $i \neq n$ . Clearly, for all  $i$ ,  $T_2(\{x_i\}) \subseteq T_1(\{x_i\})$  and  $T_2(\{x_i\}) \not\subseteq T_1(C)$  for any  $C \neq \{x_i\}$ . Thus,  
 160 we obtain a subset teaching sequence of order 2 for  $\mathcal{C}$ , i.e.,  $\text{STD}_{\min}(\mathcal{C}) = 2$ .  $\square$

| concept in $\mathcal{C}_4$ | $x_1$    | $x_2$    | $x_3$    | $x_4$    | $x_5$    | $T_1$                                                  |
|----------------------------|----------|----------|----------|----------|----------|--------------------------------------------------------|
| $\mathcal{C}_1$            | <b>1</b> | <b>0</b> | 0        | 0        | 0        | $\{(x_1, 1), (x_2, 0), (x_3, 0), (x_4, 0), (x_5, 0)\}$ |
| $\mathcal{C}_2$            | 0        | <b>1</b> | <b>0</b> | 0        | 0        | $\{(x_1, 0), (x_2, 1), (x_3, 0), (x_4, 0), (x_5, 0)\}$ |
| $\mathcal{C}_3$            | 0        | 0        | <b>1</b> | <b>0</b> | 0        | $\{(x_1, 0), (x_2, 0), (x_3, 1), (x_4, 0), (x_5, 0)\}$ |
| $\mathcal{C}_4$            | 0        | 0        | 0        | <b>1</b> | <b>0</b> | $\{(x_1, 0), (x_2, 0), (x_3, 0), (x_4, 1), (x_5, 0)\}$ |
| $\mathcal{C}_5$            | <b>0</b> | 0        | 0        | 0        | <b>1</b> | $\{(x_1, 0), (x_2, 0), (x_3, 0), (x_4, 0), (x_5, 1)\}$ |
| $\mathcal{C}_6$            | <b>1</b> | <b>1</b> | 0        | 0        | 0        | $\{(x_1, 1), (x_2, 1)\}$                               |
| $\mathcal{C}_7$            | <b>1</b> | 0        | <b>1</b> | 0        | 0        | $\{(x_1, 1), (x_3, 1)\}$                               |
| $\mathcal{C}_8$            | <b>1</b> | 0        | 0        | <b>1</b> | 0        | $\{(x_1, 1), (x_4, 1)\}$                               |
| $\mathcal{C}_9$            | <b>1</b> | 0        | 0        | 0        | <b>1</b> | $\{(x_1, 1), (x_5, 1)\}$                               |
| $\mathcal{C}_{10}$         | 0        | <b>1</b> | <b>1</b> | 0        | 0        | $\{(x_2, 1), (x_3, 1)\}$                               |
| $\mathcal{C}_{11}$         | 0        | <b>1</b> | 0        | <b>1</b> | 0        | $\{(x_2, 1), (x_4, 1)\}$                               |
| $\mathcal{C}_{12}$         | 0        | <b>1</b> | 0        | 0        | <b>1</b> | $\{(x_2, 1), (x_5, 1)\}$                               |
| $\mathcal{C}_{13}$         | 0        | 0        | <b>1</b> | <b>1</b> | 0        | $\{(x_3, 1), (x_4, 1)\}$                               |
| $\mathcal{C}_{14}$         | 0        | 0        | <b>1</b> | 0        | <b>1</b> | $\{(x_3, 1), (x_5, 1)\}$                               |
| $\mathcal{C}_{15}$         | 0        | 0        | 0        | <b>1</b> | <b>1</b> | $\{(x_4, 1), (x_5, 1)\}$                               |

Table 4: The concept class  $\mathcal{C}_n$  [Zilles et al., 2011], from the proof of Proposition 13 for the case  $n = 4$ . The final subset teaching sets (corresponding to  $T_2$ ) that witness  $\text{STD}_{\min}(\mathcal{C}_n) = 2$  are highlighted in blue. The rightmost column shows the mapping  $T_1$ ; the subsets marked in blue are not contained in any other set in that column, hence they can be used by the teacher  $T_2$  in the next iteration. When calculating  $\text{STD}$  instead of  $\text{STD}_{\min}$ , the teacher  $T_1$  assigns every singleton its unique minimum teaching set, which is a set of four negative examples. These sets cannot be reduced in subsequent iterations, since their proper subsets occur in minimum teaching sets for other concepts; hence  $\text{STD}(\mathcal{C}_4) = 4$ .

161 **Proposition 15**  $\text{STD}_{\min}$  is class-monotonic, domain-monotonic, and satisfies the antichain property.

162 **Proof.** Class-monotonicity is obvious: If  $\mathcal{C}, \mathcal{C}'$  are concept classes over a fixed domain  $X$ ,  $\mathcal{C} \subseteq \mathcal{C}'$ ,  
 163 and  $\mathcal{T}' = (T'_k)_{k \in \mathbb{N}}$  is a subset teaching sequence for  $\mathcal{C}'$  of order  $\text{STD}_{\min}(\mathcal{C}')$ , then define  $T_k$  to be  
 164 the restriction of  $T'_k$  to  $\mathcal{C}$ . Clearly,  $\mathcal{T} = (T_k)_{k \in \mathbb{N}}$  is a subset teaching sequence for  $\mathcal{C}$  of order at most  
 165  $\text{STD}_{\min}(\mathcal{C}')$ . Hence  $\text{STD}_{\min}(\mathcal{C}) \leq \text{STD}_{\min}(\mathcal{C}')$ .

166 To establish domain-monotonicity, let  $\mathcal{C}$  be any concept class over a domain  $X$ , and let  $X' \subseteq X$   
167 preserve  $\mathcal{C}$ . Then any subset teaching sequence  $\mathcal{T}'$  for  $\mathcal{C}_{\downarrow X'}$  can be turned into a subset teaching  
168 sequence  $\mathcal{T}$  for  $\mathcal{C}$ , by setting  $T_0(\mathcal{C}) = \{(x, C(x)) \mid x \in X\}$  and  $T_k(\mathcal{C}) = T'_k(\mathcal{C})$  for all  $C \in \mathcal{C}$  and  
169 all  $k \geq 1$ . Note that  $\text{ord}_{\mathcal{C}}(\mathcal{T}) = \text{ord}_{\mathcal{C}_{\downarrow X'}}(\mathcal{T}')$ . Therefore  $\text{STD}_{\min}(\mathcal{C}_{\downarrow X'}) \geq \text{STD}_{\min}(\mathcal{C})$ .

170 By the definition of subset teaching sequence, it is obvious that  $\text{STD}_{\min}$  satisfies the antichain  
171 property.  $\square$

## 172 D Proof Details for Section 5

173 **Proposition 16** For every  $n \in \mathbb{N}$  there is (i) a concept class  $\mathcal{C}$  with  $\text{STD}(\mathcal{C}) = \text{STD}_{\min}(\mathcal{C}) = 1$  and  
174  $\text{NCTD}(\mathcal{C}) = n$ ; (ii) a concept class  $\mathcal{C}$  with  $\text{STD}(\mathcal{C}) = \text{STD}_{\min}(\mathcal{C}) = n$  and  $\text{NCTD}(\mathcal{C}) = \frac{n}{2}$ .

175 **Proof.** (i) Consider the class  $\mathcal{C}_u^{\text{pair}}$ , as defined by Zilles et al. [2011], for any number  $u \geq 3$ . This  
176 concept class is shown in Table 5 for  $u = 3$ . It is defined over  $2^u + u$  instances  $x_1, \dots, x_{2^u+u}$ . The  
177 set  $\{x_{2^u+1}, \dots, x_{2^u+u}\}$  of the last  $u$  instances is shattered. Let  $\alpha_1, \dots, \alpha_{2^u}$  be the list of all possible  
178 assignments of labels to the last  $u$  instances. For each such assignment  $\alpha_i$ , the concept class contains  
179 two concepts  $C_{2i-1}$  and  $C_{2i}$  realizing  $\alpha_i$ . The concept  $C_{2i-1}$  does not contain any of the first  $2^u$   
180 instances  $x_1, \dots, x_{2^u}$ . The concept  $C_{2i}$  contains  $x_i$ , but none of the other instances in  $\{x_1, \dots, x_{2^u}\}$ .  
181 See Table 5 for an illustration when  $u = 3$ . Note that this concept class can be equivalently written in  
182 block matrix form as follows:

$$\begin{bmatrix} I_{2^u} & P_u \\ 0 & P_u \end{bmatrix}$$

183 where  $P_u$  represents the powerset over a set of  $u$  instances and  $I_{2^u}$  is the  $2^u \times 2^u$  identity matrix.

184 It was proven by Zilles et al. [2011] that  $\text{STD}(\mathcal{C}_u^{\text{pair}}) = 1$ . We claim that  $\text{NCTD}(\mathcal{C}_u^{\text{pair}}) = \lceil \frac{u}{2} \rceil$ .  
185 To see this, note that the subclass of concepts  $C_{2i-1}$ ,  $1 \leq i \leq 2^u$  is the powerset over the last  
186  $u$  instances, where all these concepts agree on the first  $2^u$  instances. Thus, the NCTD of this  
187 subclass equals the NCTD of the powerset over  $u$  instances, which is  $\lceil \frac{u}{2} \rceil$  [Kirkpatrick et al., 2019].  
188 Since NCTD is class-monotonic, we have  $\text{NCTD}(\mathcal{C}_u^{\text{pair}}) \geq \lceil \frac{u}{2} \rceil$ . A teacher mapping  $T$  witnessing  
189  $\text{NCTD}(\mathcal{C}_u^{\text{pair}}) \leq \lceil \frac{u}{2} \rceil$  can be defined by (i) setting  $T(C_{2i}) = \{(x_i, 1)\}$  for  $1 \leq i \leq 2^u$ , and (ii)  
190 teaching the concepts  $C_{2i-1}$ ,  $1 \leq i \leq 2^u$ , with a non-clashing teacher for the powerset over the last  
191  $u$  instances, as used by Kirkpatrick et al. [2019]. Clearly,  $T$  is clash-free.

192 For  $n \in \mathbb{N}$  and  $u = 2n$ , thus  $\text{STD}(\mathcal{C}_u^{\text{pair}}) = \text{STD}_{\min}(\mathcal{C}_u^{\text{pair}}) = 1$  and  $\text{NCTD}(\mathcal{C}_u^{\text{pair}}) = n$ .

193 (ii) Consider the powerset  $\mathcal{P}_n$  on  $n$  instances. The fact that  $\text{NCTD}(\mathcal{C}) = \frac{n}{2}$  was shown by Kirkpatrick  
194 et al. [2019]. It is obvious that  $\text{STD}_{\min}(\mathcal{P}_n) = n$ : Every sample set for a concept  $C \in \mathcal{P}_n$  that omits  
195 one instance from  $X$  is also a sample set for some concept  $C' \neq C$ ,  $C' \in \mathcal{P}_n$ . Thus any subset  
196 teaching sequence for  $\mathcal{P}_n$  satisfies  $T_k = T_0$  for all  $k \in \mathbb{N}$ .  $\square$

## 197 E Details for Section 6

### 198 E.1 Proof Details for Theorem 20

199 To complete the proof of Theorem 20, we show that  $\text{STD}_{\min}$  is not unambiguous on Warmuth's  
200 class  $\mathcal{C}_W$  which was defined by Doliwa et al. [2014] after communication with M. Warmuth.  $\mathcal{C}_W$   
201 is a concept class of 10 concepts over 5 instances, see Table 6. We know that  $\text{VCD}(\mathcal{C}_W) =$   
202  $\text{VCD}_{\min}(\mathcal{C}_W) = 2$ , while  $\text{RTD}(\mathcal{C}_W) = \text{STD}(\mathcal{C}_W) = 3$ . It turns out that  $\text{STD}_{\min}(\mathcal{C}_W) \leq 2$ , as  
203 witnessed by the subset teaching sequence that is highlighted in Table 6. However, there is a second  
204  $\text{STD}_{\min}$ -teacher for  $\mathcal{C}_W$  that has exactly the same range as the one resulting from the subset teaching  
205 sequence in Table 6 – see Table 7. A comparison of Tables 6 and 7 shows that  $T_2$  and  $T'_2$  swap the  
206 teaching sets for  $C_{2i-1}$  and  $C_{2i}$ , for all  $i \in \{1, \dots, 5\}$ .

### 207 E.2 Redundant Instances Can Cause Extreme Forms of Ambiguity

208 The ambiguity of  $\text{STD}_{\min}$  can take extreme forms for artificially created concept classes that have  
209 many redundant instances. An instance  $x \in X$  is redundant for  $\mathcal{C}$  if  $X \setminus \{x\}$  preserves  $\mathcal{C}$ .

| concept in $\mathcal{C}_3^{pair}$ | $x_1$    | $x_2$    | $x_3$    | $x_4$    | $x_5$    | $x_6$    | $x_7$    | $x_8$    | $x_9$    | $x_{10}$ | $x_{11}$ |
|-----------------------------------|----------|----------|----------|----------|----------|----------|----------|----------|----------|----------|----------|
| $C_1$                             | 0        | 0        | 0        | 0        | 0        | 0        | 0        | 0        | <b>0</b> | <b>0</b> | 0        |
| $C_2$                             | <b>1</b> | 0        | 0        | 0        | 0        | 0        | 0        | 0        | 0        | 0        | 0        |
| $C_3$                             | 0        | 0        | 0        | 0        | 0        | 0        | 0        | 0        | <b>0</b> | 0        | <b>1</b> |
| $C_4$                             | 0        | <b>1</b> | 0        | 0        | 0        | 0        | 0        | 0        | 0        | 0        | 1        |
| $C_5$                             | 0        | 0        | 0        | 0        | 0        | 0        | 0        | 0        | <b>0</b> | 1        | <b>0</b> |
| $C_6$                             | 0        | 0        | <b>1</b> | 0        | 0        | 0        | 0        | 0        | 0        | 1        | 0        |
| $C_7$                             | 0        | 0        | 0        | 0        | 0        | 0        | 0        | 0        | <b>0</b> | <b>1</b> | 1        |
| $C_8$                             | 0        | 0        | 0        | <b>1</b> | 0        | 0        | 0        | 0        | 0        | 1        | 1        |
| $C_9$                             | 0        | 0        | 0        | 0        | 0        | 0        | 0        | 0        | <b>1</b> | <b>0</b> | 0        |
| $C_{10}$                          | 0        | 0        | 0        | 0        | <b>1</b> | 0        | 0        | 0        | 1        | 0        | 0        |
| $C_{11}$                          | 0        | 0        | 0        | 0        | 0        | 0        | 0        | 0        | <b>1</b> | 0        | <b>1</b> |
| $C_{12}$                          | 0        | 0        | 0        | 0        | 0        | <b>1</b> | 0        | 0        | 1        | 0        | 1        |
| $C_{13}$                          | 0        | 0        | 0        | 0        | 0        | 0        | 0        | 0        | <b>1</b> | 1        | <b>0</b> |
| $C_{14}$                          | 0        | 0        | 0        | 0        | 0        | 0        | <b>1</b> | 0        | 1        | 1        | 0        |
| $C_{15}$                          | 0        | 0        | 0        | 0        | 0        | 0        | 0        | 0        | <b>1</b> | <b>1</b> | 1        |
| $C_{16}$                          | 0        | 0        | 0        | 0        | 0        | 0        | 0        | <b>1</b> | 1        | 1        | 1        |

Table 5: The concept class  $\mathcal{C}_u^{pair}$  [Zilles et al., 2011], for the case  $u = 3$ . The subset teaching sets witnessing  $\text{STD}(\mathcal{C}_3^{pair}) = 1$  are highlighted in blue. Non-clashing sets that witness  $\text{NCTD}(\mathcal{C}_3^{pair}) \leq 2$  are in bold font. The proof of Proposition 16 shows that  $\text{NCTD}(\mathcal{C}_3^{pair}) = 2$ .

| concept  | $T_0$ |       |       |       |       | $T_1$ |       |       |       |       | $T_2$ |       |       |       |       |
|----------|-------|-------|-------|-------|-------|-------|-------|-------|-------|-------|-------|-------|-------|-------|-------|
|          | $x_1$ | $x_2$ | $x_3$ | $x_4$ | $x_5$ | $x_1$ | $x_2$ | $x_3$ | $x_4$ | $x_5$ | $x_1$ | $x_2$ | $x_3$ | $x_4$ | $x_5$ |
| $C_1$    | 1     | 1     | 0     | 0     | 0     | *     | *     | 0     | 0     | 0     | *     | *     | 0     | *     | 0     |
| $C_2$    | 1     | 1     | 0     | 1     | 0     | 1     | 1     | *     | 1     | *     | 1     | 1     | *     | *     | *     |
| $C_3$    | 0     | 1     | 1     | 0     | 0     | 0     | *     | *     | 0     | 0     | 0     | *     | *     | 0     | *     |
| $C_4$    | 0     | 1     | 1     | 0     | 1     | *     | 1     | 1     | *     | 1     | *     | 1     | 1     | *     | *     |
| $C_5$    | 0     | 0     | 1     | 1     | 0     | 0     | 0     | *     | *     | 0     | *     | 0     | *     | *     | 0     |
| $C_6$    | 1     | 0     | 1     | 1     | 0     | 1     | *     | 1     | 1     | *     | *     | *     | 1     | 1     | *     |
| $C_7$    | 0     | 0     | 0     | 1     | 1     | 0     | 0     | 0     | *     | *     | 0     | *     | 0     | *     | *     |
| $C_8$    | 0     | 1     | 0     | 1     | 1     | *     | 1     | *     | 1     | 1     | *     | *     | *     | 1     | 1     |
| $C_9$    | 1     | 0     | 0     | 0     | 1     | *     | 0     | 0     | 0     | *     | *     | 0     | *     | 0     | *     |
| $C_{10}$ | 1     | 0     | 1     | 0     | 1     | 1     | *     | 1     | *     | 1     | 1     | *     | *     | *     | 1     |

Table 6: The concept class  $\mathcal{C}_W$ . A subset teaching sequence can be chosen by defining  $T_1(C_{2i})$  to consist of the only three positive examples for  $C_{2i}$ , and  $T_1(C_{2i-1})$  to consist of the only three negative examples for  $C_{2i-1}$ , where  $1 \leq i \leq 5$ . In  $T_2$ , these sets can easily be reduced to sets of size 2. Asterisks denote instances not occurring in the chosen teaching sets.

210 **Example 1** For arbitrary  $n \in \mathbb{N}$ , consider a concept class for which  $\text{VCD}$  is  $n$ , while  $\text{STD}_{\min}$   
211 equals 1, with a large number of redundant instances. Such a class can be constructed over a domain  
212  $X$  that has  $n2^n$  instances and is partitioned into  $2^n$  sets  $X_1, \dots, X_{2^n}$ , each of size  $n$ . The concept  
213 class consists of  $2^n$  concepts, chosen so that they shatter each set  $X_i$ ,  $1 \leq i \leq 2^n$ . See Table 8 for an  
214 illustration when  $n = 2$ .

215 To see that  $\text{STD}_{\min}$  equals 1, let  $C_1, \dots, C_{2^n}$  be an enumeration of all concepts in this concept class.  
216 It suffices to pick a teaching sequence as follows. We define  $T_1(C_i) = \{(x, C_i(x)) \mid x \in X_i\}$ , that  
217 means, we pick the instances in the  $i$ th set  $X_i$  to represent the  $i$ th concept. Now  $T_2(C_i)$  can consist  
218 of any single example from  $T_1(C_i)$ , since  $T_1(C_i) \cap T_1(C_j) = \emptyset$  for all  $j \neq i$ .

219 Obviously, by reordering concepts, we obtain different  $\text{STD}_{\min}$ -teachers that have the same range;  
220 in particular, they witness a very high degree of ambiguity, as will be formalized in Observation 1.

221 Example 1 can be generalized to the following observation.

222 **Observation 1** Let  $\mathcal{C}$  be any concept class over a domain  $X$ . Suppose  $X$  can be partitioned into a  
223 family  $(X_C)_{C \in \mathcal{C}}$  of subsets such that  $X_C$  preserves  $\mathcal{C}$ , for every  $C \in \mathcal{C}$ . Then  $\text{STD}_{\min}(\mathcal{C}) = 1$  and  
224 there are at least  $|\mathcal{C}|!$  pairwise distinct  $\text{STD}_{\min}$ -teachers for  $\mathcal{C}$  with the same range on  $\mathcal{C}$ . In particular,  
225 every permutation  $\sigma$  of  $\mathcal{C}$  yields an  $\text{STD}_{\min}$ -teacher that maps a concept  $C$  to the singleton sample  
226 set  $\{(x_{\sigma(C)}, C(x_{\sigma(C)}))\}$ , where  $x_{\sigma(C)}$  is any instance in  $X_{\sigma(C)}$ .

| concept  | $T'_0 = T_0$ |       |       |       |       | $T'_1$ |       |       |       |       | $T'_2$ |       |       |       |       |
|----------|--------------|-------|-------|-------|-------|--------|-------|-------|-------|-------|--------|-------|-------|-------|-------|
|          | $x_1$        | $x_2$ | $x_3$ | $x_4$ | $x_5$ | $x_1$  | $x_2$ | $x_3$ | $x_4$ | $x_5$ | $x_1$  | $x_2$ | $x_3$ | $x_4$ | $x_5$ |
| $C_1$    | 1            | 1     | 0     | 0     | 0     | 1      | 1     | *     | 0     | *     | 1      | 1     | *     | *     | *     |
| $C_2$    | 1            | 1     | 0     | 1     | 0     | *      | *     | 0     | 1     | 0     | *      | *     | 0     | *     | 0     |
| $C_3$    | 0            | 1     | 1     | 0     | 0     | *      | 1     | 1     | *     | 0     | *      | 1     | 1     | *     | *     |
| $C_4$    | 0            | 1     | 1     | 0     | 1     | 0      | *     | *     | 0     | 1     | 0      | *     | *     | 0     | *     |
| $C_5$    | 0            | 0     | 1     | 1     | 0     | 0      | *     | 1     | 1     | *     | *      | *     | 1     | 1     | *     |
| $C_6$    | 1            | 0     | 1     | 1     | 0     | 1      | 0     | *     | *     | 0     | *      | 0     | *     | *     | 0     |
| $C_7$    | 0            | 0     | 0     | 1     | 1     | *      | 0     | *     | 1     | 1     | *      | *     | *     | 1     | 1     |
| $C_8$    | 0            | 1     | 0     | 1     | 1     | 0      | 1     | 0     | *     | *     | 0      | *     | 0     | *     | *     |
| $C_9$    | 1            | 0     | 0     | 0     | 1     | 1      | *     | 0     | *     | 1     | 1      | *     | *     | *     | 1     |
| $C_{10}$ | 1            | 0     | 1     | 0     | 1     | *      | 0     | 1     | 0     | *     | *      | 0     | *     | 0     | *     |

Table 7: A second subset teaching sequence for the concept class  $C_W$ .

| concept | $X_1$ |       | $X_2$ |       | $X_3$ |       | $X_4$ |       |
|---------|-------|-------|-------|-------|-------|-------|-------|-------|
|         | $x_1$ | $x_2$ | $x_3$ | $x_4$ | $x_5$ | $x_6$ | $x_7$ | $x_8$ |
| $C_1$   | 0     | 0     | 0     | 0     | 0     | 0     | 0     | 0     |
| $C_2$   | 0     | 1     | 0     | 1     | 0     | 1     | 0     | 1     |
| $C_3$   | 1     | 0     | 1     | 0     | 1     | 0     | 1     | 0     |
| $C_4$   | 1     | 1     | 1     | 1     | 1     | 1     | 1     | 1     |

Table 8: The concept class from Example 1, for the case  $n = 2$ . Highlighted in blue are the labels chosen for teaching individual concepts with  $T_1$ . Clearly,  $T_2$  can be defined to assign each concept a singleton sample set.

## 227 References

- 228 T. Doliwa, G. Fan, H. U. Simon, and S. Zilles. Recursive teaching dimension, VC-dimension and sample  
229 compression. *J. Mach. Learn. Res.*, 15:3107–3131, 2014.
- 230 D. Kirkpatrick, H. U. Simon, and S. Zilles. Optimal collusion-free teaching. In *Proceedings of Machine Learning  
231 Research (ALT2019)*, volume 98, 2019.
- 232 S. Zilles, S. Lange, R. Holte, and M. Zinkevich. Models of cooperative teaching and learning. *J. Mach. Learn.  
233 Res.*, 12:349–384, 2011.
